# Supplementary material for: Spinal cord hypermetabolism extends to skeletal muscle in amyotrophic lateral sclerosis: a computational approach to [18F]-fluorodeoxyglucose PET/CT images
Source: Springer Nature journal article supplement (doi:10.1186/s13550-020-0607-5), 2020-03-23

**BA4 N-SUV**

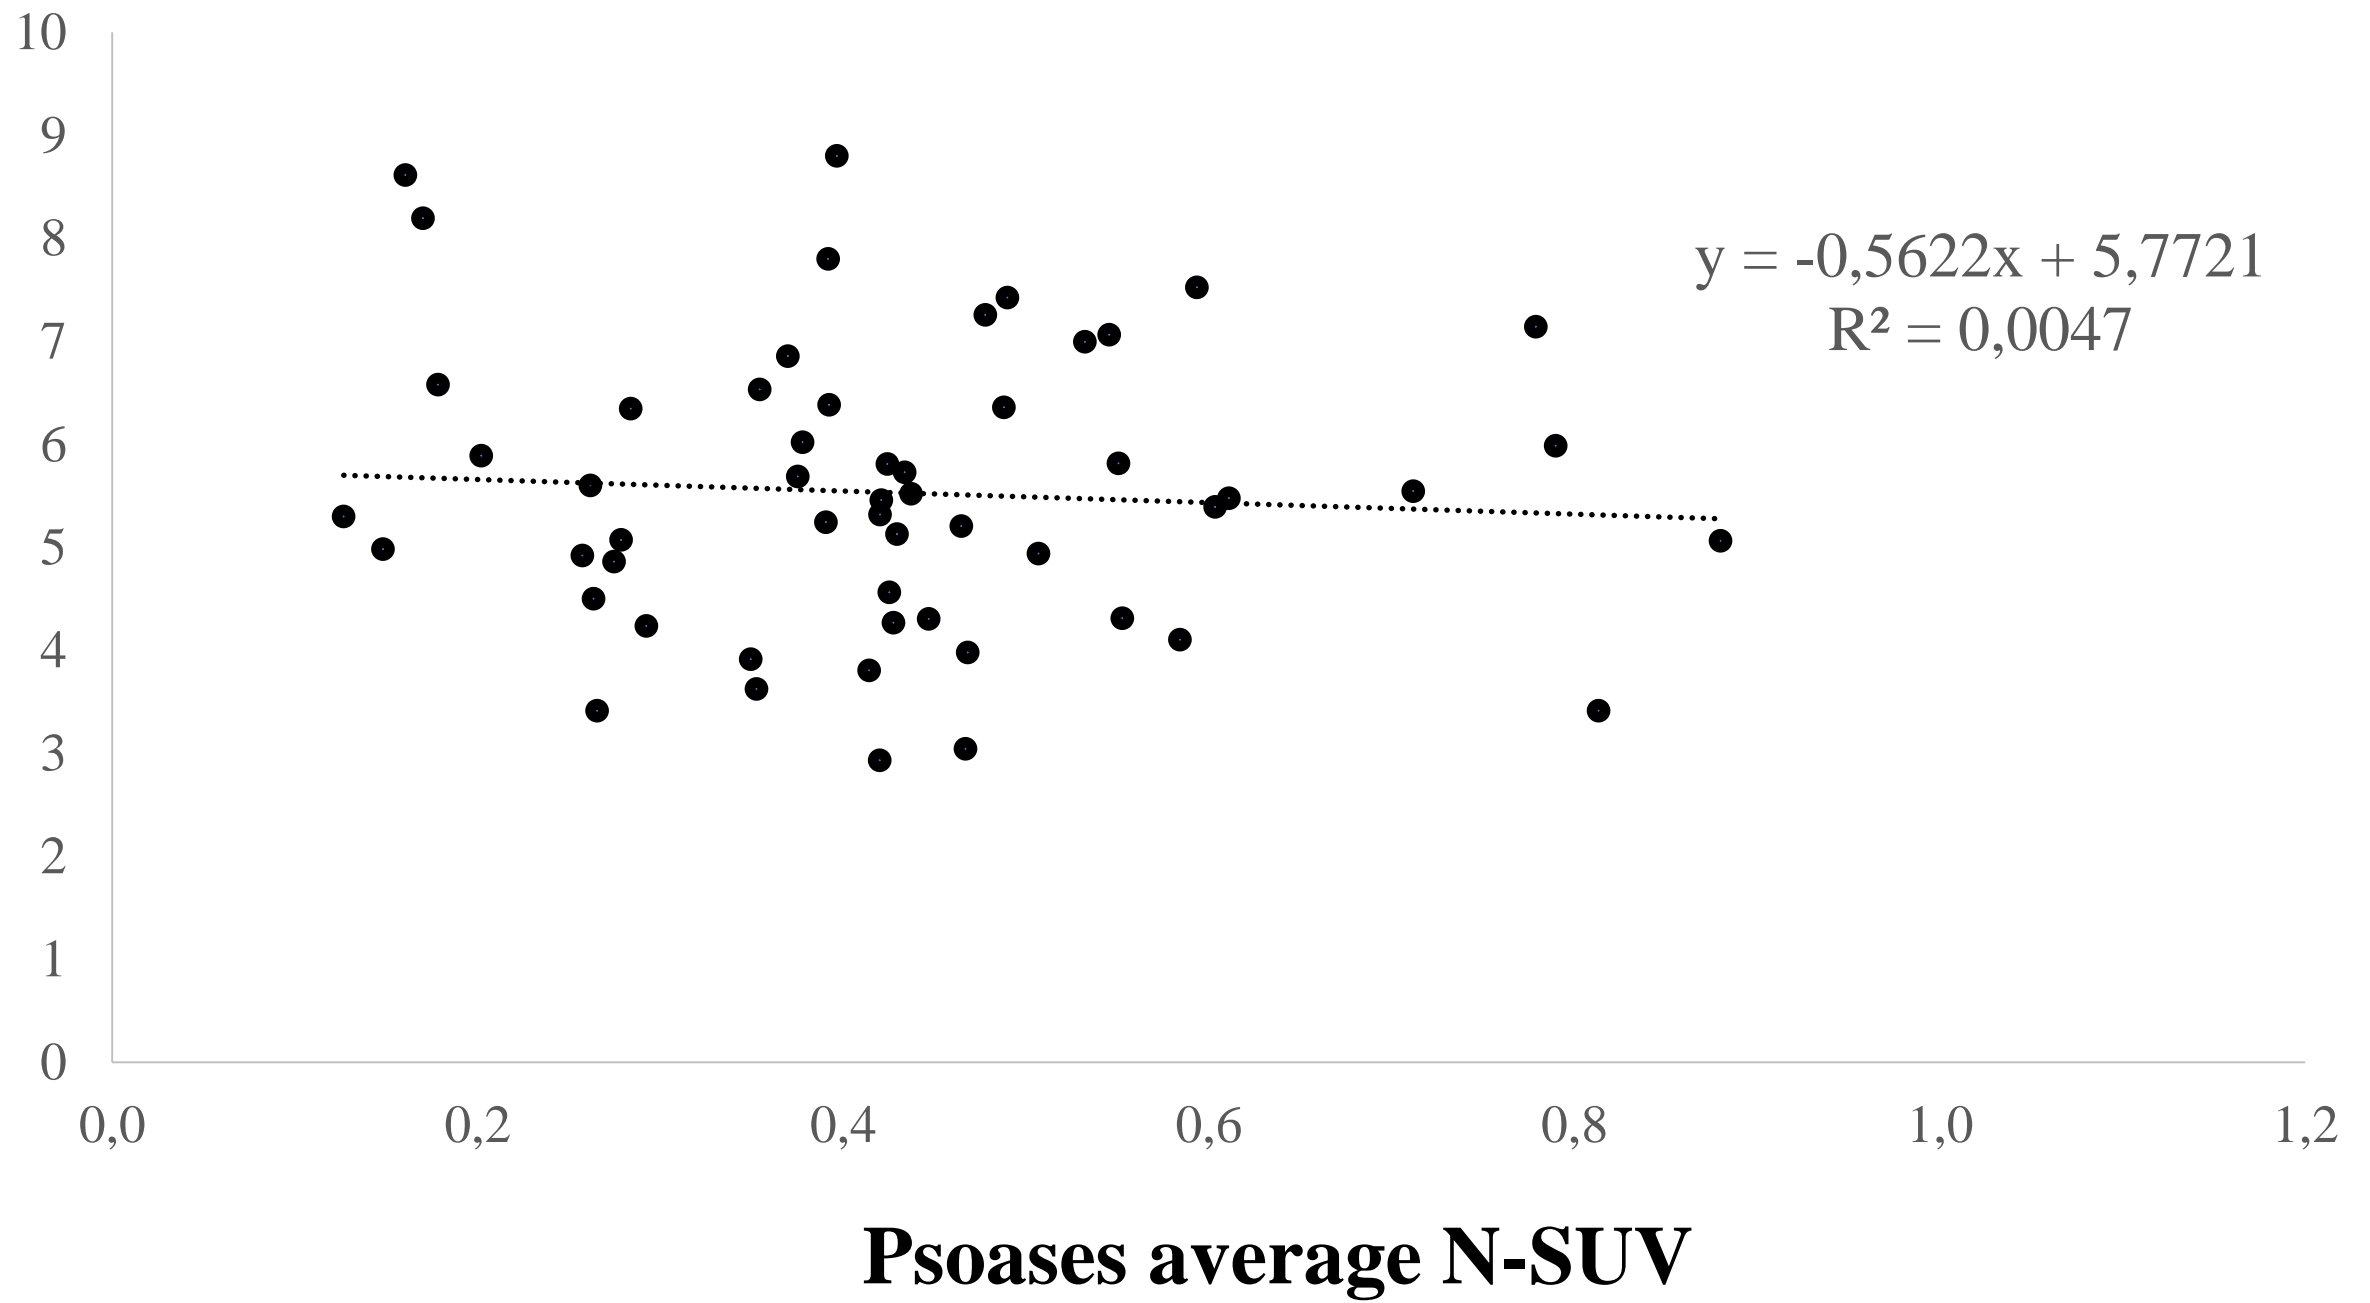

Supplement: MOESM1 [file 17824154]
